# Supplementary material for: CeO2-modified Au@SBA-15 nanocatalysts for liquid-phase selective oxidation of benzyl alcohol
Source: Royal Society of Chemistry journal article supplement (doi:10.1039/c5nr00246j), 2015-01-01
Supplement: c5nr00246j1.pdf [file c5nr00246j1.pdf]

**Supporting Information**

**CeO<sub>2</sub>-Modified Au@SBA-15 Nanocatalysts for  
Liquid-phase Selective Oxidation of Benzyl  
Alcohol**

Tuo Wang, Xiang Yuan, Shuirong Li, Liang Zeng, and Jinlong Gong<sup>\*</sup>

*Key Laboratory for Green Chemical Technology of Ministry of Education, School of Chemical Engineering and Technology, Tianjin University; Collaborative Innovation Center of Chemical Science and Engineering, Tianjin 300072, China.*

<sup>\*</sup> Corresponding author: jlgong@tju.edu.cn, Fax: +86-22-87401818;

**Table S1.** ICP and TEM results of reused catalysts.

| Catalyst                                    | Au loading (wt.%) | d <sub>Au</sub> /nm by TEM |
|---------------------------------------------|-------------------|----------------------------|
| Au-100CeO <sub>2</sub> @SBA-15 <sup>a</sup> | 1.92              | 4.9±0.7                    |

<sup>a</sup> Results for the third run.

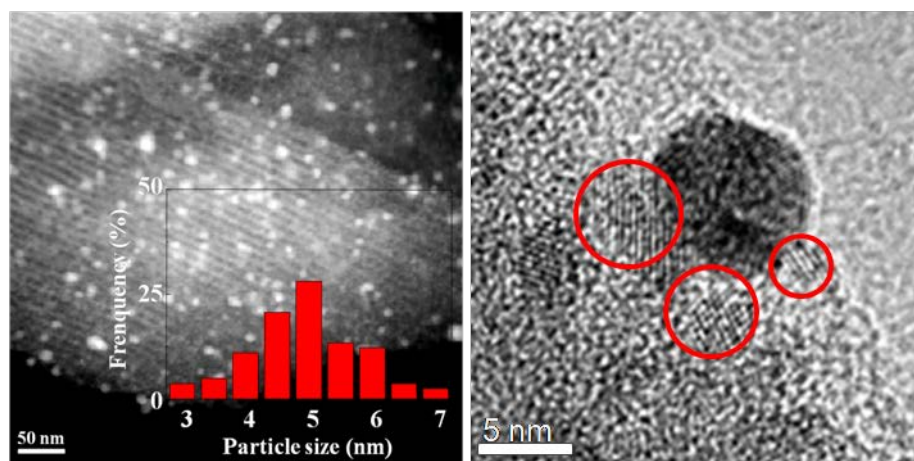

**Figure S1.** HAADF-STEM and HRTEM images of Au-100CeO<sub>2</sub>@SBA-15 catalyst reused for three runs.
